# Supplementary material for: Burden of enteric fever in the India-Bangladesh-Myanmar border region
Source: Research Square preprint supplement (doi:10.21203/rs.3.rs-6879929/v1), 2025-09-22
Supplement: Supplementary file 1 [file 0eaa2475938e223e3b6b8c00.docx]

**Supplementary file**

**Supplementary Table 01:** Incidence of Age-Wise Enteric Fever Stratified by Diagnostic Test Across Districts in Mizoram (N=30000)

| **Districts** | **Widal test**  **(Cases/ 100 000 person-years)** | | | **Typhidot**  **(Cases/ 100 000 person-years)** | | | **Culture**  **(Cases/ 100 000 person-years)** | | | **Total**  **(Cases/ 100 000 person-years)** | | |
| --- | --- | --- | --- | --- | --- | --- | --- | --- | --- | --- | --- | --- |
| **Below 15** | **15 and above** | **Total** | **Below 15** | **15 and above** | **Total** | **Below 15** | **15 and above** | **Total** | **Below 15** | **15 and above** | **Total** |
| **Aizawl** | 260 [244.3 - 276.0] | 221 [210.9 - 230.9] | 233 [224.9 - 241.8] | 315 [297.9 - 332.8] | 421 [407.8 - 435.5] | 387 [376.6 - 398.4] | 39 [32.9 - 45.4] | 28 [24.3 - 31.5] | 31 [28.2 - 34.5] | 614 [589.6 - 638.2] | 670 [652.7 - 687.6] | 652 [637.9 - 666.2] |
| **Champhai** | 959 [896.5 - 1024.8] | 533 [500.9 - 566.5] | 669 [639.6 - 700.0] | 251 [219.8 - 286.0] | 204 [184.4 - 225.1] | 219 [202.3 - 237.0] | 3 [0.7 - 9.6] | 4 [1.5 - 7.4] | 4 [1.7 - 6.5] | 1214 [1143.2 - 1287.3] | 741 [702.7 - 779.9] | 892 [857.6 - 927.3] |
| **Hnahthial** | 636 [550.5 - 730.0] | 884 [814.0 - 958.0] | 804 [749.3 - 862.4] | 645 [559.4 - 740.2] | 640 [580.8 - 703.7] | 642 [592.6 - 693.7] | 54 [31.5 - 86.5] | 67 [49.1 - 90.0] | 63 [48.3 - 80.8] | 1335 [1210.1 - 1468.6] | 1591 [1497.0 - 1689.7] | 1509 [1433.3 - 1587.9] |
| **Khawzawl** | 610 [528.3 - 700.6] | 297 [258.0 - 340.4] | 397 [359.5 - 437.7] | 247 [196.2 - 307.0] | 222 [188.8 - 260.4] | 230 [201.9 - 261.7] | 3 [0.1 - 17.0] | 3 [0.3 - 10.4] | 3 [0.6 - 8.6] | 860 [762.5 - 966.4] | 522 [470.1 - 578.9] | 630 [582.8 - 681.0] |
| **Kolasib** | 292 [258.6 - 328.2] | 164 [146.8 - 182.5] | 205 [189.0 - 221.8] | 223 [193.9 - 254.8] | 194 [175.3 - 214.1] | 203 [187.4 - 220.0] | 28 [18.6 - 41.1] | 27 [20.0 - 34.7] | 27 [21.5 - 33.7] | 543 [497.2 - 591.7] | 384 [358.0 - 412.4] | 435 [411.9 - 459.5] |
| **Lawngtlai** | 453 [416.7 - 490.6] | 288 [268.2 - 308.5] | 341 [322.8 - 359.0] | 181 [158.2 - 205.2] | 103 [91.1 - 115.4] | 128 [116.9 - 139.1] | 37 [27.2 - 48.9] | 43 [35.6 - 51.5] | 41 [35.1 - 47.8] | 670 [626.3 - 716.0] | 434 [409.3 - 458.8] | 509 [487.5 - 531.6] |
| **Lunglei** | 569 [527.0 - 612.6] | 450 [424.2 - 476.3] | 488 [465.8 - 510.5] | 1339 [1275.2 - 1406.0] | 879 [842.8 - 915.5] | 1026 [994.1 - 1058.7] | 55 [42.7 - 69.9] | 26 [20.4 - 33.3] | 35 [29.8 - 42.0] | 1963 [1885.2 - 2043.4] | 1355 [1310.1 - 1400.2] | 1549 [1510.0 - 1589.4] |
| **Mamit** | 698 [643.6 - 756.3] | 538 [504.6 - 572.3] | 589 [560.4 - 618.7] | 88 [69.5 - 110.3] | 136 [119.6 - 153.9] | 121 [107.9 - 134.5] | 9 [4.0 - 18.3] | 19 [12.9 - 25.9] | 16 [11.2 - 21.1] | 796 [737.2 - 857.5] | 692 [654.5 - 731.3] | 725 [693.4 - 758.1] |
| **Saiha** | 10 [2.6 - 24.7] | 18 [10.4 - 29.4] | 15 [9.4 - 23.8] | 1064 [967.6 - 1168.5] | 750 [694.2 - 809.7] | 851 [801.4 - 902.5] | 104 [74.9 - 139.5] | 103 [83.0 - 126.6] | 103 [86.5 - 122.3] | 1178 [1075.6 - 1286.8] | 872 [811.0 - 935.4] | 969 [916.7 - 1024.6] |
| **Saitual** | 1047 [959.2 - 1140.0] | 669 [621.1 - 720.0] | 790 [746.7 - 835.1] | 177 [142.0 - 217.5] | 140 [118.7 - 164.5] | 152 [133.2 - 172.4] | 6 [1.2 - 17.4] | 5 [1.5 - 10.9] | 5 [2.2 - 10.0] | 1229 [1134.4 - 1330.2] | 814 [760.9 - 869.9] | 947 [899.5 - 996.3] |
| **Serchhip** | 965 [885.7 - 1050.2] | 888 [834.8 - 942.7] | 912 [868.2 - 958.3] | 685 [618.3 - 757.2] | 903 [850.3 - 959.1] | 834 [791.4 - 877.5] | 62 [43.5 - 86.9] | 65 [51.0 - 80.8] | 64 [52.7 - 76.9] | 1713 [1606.3 - 1824.8] | 1856 [1779.1 - 1934.6] | 1810 [1747.5 -1874.1] |
| **Mizoram** | **487 [474.7 - 500.4]** | **363 [355.3 - 370.5]** | **403 [396.1 - 409.3]** | **426 [413.7 - 437.8]** | **399 [391.4 - 407.4]** | **408 [401.2 - 414.5]** | **36 [32.4 - 39.5]** | **31 [28.4 - 32.8]** | **32 [30.4 - 34.1]** | **949 [931.1 - 967.0]** | **793 [781.5 - 804.0]** | **843 [833.2 - 852.3]** |
| Note: The population was taken from Harvard population estimates for 2022 except for Saitual.  The population for Saitual was calculated from the percentage increase of Aizawl and the population of the 2011 census of Saitual.  Incidence was calculated as cases per 100 000 child-years for <15 years age group and cases per 100000 person-years for ≥ 15 years age group.  Cumulative incidence calculates the incidence during the study period (2 years, 9 months) | | | | | | | | | | | | |

**Supplementary Table 02:** Socio-demographic and clinical profile of enteric fever affecting hospitalization in Mizoram from 2022- September 2024 (n=30000)

|  | Hospitalization | | | p-value |
| --- | --- | --- | --- | --- |
| IPD | OPD | Total |
| n (%) | n (%) | n (%) |
| Sex (n=29996)a | | | | 0.538 |
| Male | 921 (48%) | 13285 (47%) | 14206 (47.4%) |
| Female | 996 (52%) | 14794 (53%) | 15790 (52.6%) |
| Pathogen type (n=15448)b | | | | ≤0.001* |
| *S*. Typhi | 1011 (87%) | 10711 (75%) | 11722 (75.9%) |
| *S*. Paratyphi | 153 (13%) | 3573 (25%) | 3726 (24%) |
| Place of residence | | | | ≤0.001* |
| Urban | 1099 (57%) | 7096 (25%) | 8195 (27%) |
| Rural | 818 (43%) | 20987 (75%) | 21805 (73%) |
| Age | | | | ≤0.001* |
| Below 2 years | 142 (7.4%) | 1152 (4.1%) | 1294 (4.3%) |
| 2-4 years | 142 (7.4%) | 2645 (9.4%) | 2787 (9.3%) |
| 5-14 years | 241 (12.6%) | 6488 (23.1%) | 6729 (22.4%) |
| 15-44 years | 777 (40.5%) | 11662 (41.5%) | 12439 (41.5%) |
| 45 years and above | 615 (32.1%) | 6136 (21.8%) | 6751 (22.5%) |
| Provisional diagnosis | | | | ≤0.001* |
| Only fever < 7 days | 1045 (54.5%) | 12811 (45.6%) | 13856 (46.2%) |
| Only fever >= 7 days | 280 (14.6%) | 3817 (13.6%) | 4097 (13.7%) |
| Typhoidc | 592 (30.9%) | 11455 (40.8%) | 12047 (40.2%) |
| Test performed | | | | ≤0.001* |
| Widal test | 1037 (54.1%) | 13299 (47.4%) | 14336 (47.8%) |
| Rapid diagnostic test kits | 751 (39.2%) | 13766 (49%) | 14517 (48.4%) |
| Culture | 129 (6.7%) | 1018 (3.6%) | 1147 (3.8%) |
| Hospital type | | | | ≤0.001* |
| Public | 645 (34%) | 22896 (82%) | 23541 (78%) |
| Private | 1272 (66%) | 5187 (18%) | 6459 (22%) |
| Total | **1917** | **28083** | **30000** |  |

A chi-square test was carried out, and variables were considered significant at p < 0.05. **Dependent variable –** hospitalization. aThe transgenders in the dataset are considered missing values due to their negligible count (n=4); bPathogen type for Cases tested with Rapid diagnostic kits is not defined; cTyphoid symptoms – Fever, headache, diarrhoea, and rashes in some cases; *statistically significant associations found.

**Supplementary Table 03:** Incidence of age-wise enteric fever among the districts in Mizoram from 2022- September 2024 (n= 30000)

| **Districts** | | **2022**  **(Cases/ 100 000 person-years)** | | | **2023**  **(Cases/ 100 000 person-years)** | | | **2024 (until September)**  **(Cases/ 100 000 person-years)** | | | **Average incidence (2022- September 2024)**  **(Cases/ 100 000 person-years)** | | |
| --- | --- | --- | --- | --- | --- | --- | --- | --- | --- | --- | --- | --- | --- |
| Below 15 | 15 and above | Total | Below 15 | 15 and above | Total | Below 15 | 15 and above | Total | Below 15 | 15 and above | Total |
| **Aizawl** | Cases | 457 | 926 | 1383 | 1371 | 3004 | 4375 | 640 | 1797 | 2437 | 2468 | 5727 | 8195 |
| Incidence | 312 [284-341] | 298 [279-317] | 303 [287-318] | 937 [888-987] | 966 [932-1001] | 957 [929-985] | 583 [538-629] | 771 [735-806] | 711 [683-739] | 614 [565-662] | 670 [619-721] | 652 [602-702] |
| **Champhai** | Cases | 260 | 205 | 465 | 502 | 584 | 1086 | 344 | 645 | 989 | 1106 | 1434 | 2540 |
| Incidence | 785 [689-880] | 291 [251-331] | 449 [408-490] | 1515 [1382-1647] | 829 [762-897] | 1049 [986-1111] | 1384 [1238-1530] | 1221 [1127-1316] | 1273 [1194-1353] | 1214 [1145-1282] | 741 [687-794] | 892 [833-950] |
| **Hnahthial** | Cases | 135 | 312 | 447 | 185 | 450 | 635 | 100 | 302 | 402 | 420 | 1064 | 1484 |
| Incidence | 1180 [981-1379] | 1283 [1141-1425] | 1250 [1134-1366] | 1617 [1384-1850] | 1851 [1680-2022] | 1776 [1638-1914] | 1165 [937-1394] | 1656 [1469-1843] | 1499 [1352-1645] | 1335 [1263-1406] | 1591 [1513-1669] | 1509 [1433-1585] |
| **Khawzawl** | Cases | 23 | 42 | 65 | 196 | 193 | 389 | 63 | 129 | 192 | 282 | 364 | 646 |
| Incidence | 193 [114-272] | 166 [116-216] | 174 [132-217] | 1644 [1414-1874] | 762 [654-869] | 1044 [940-1148] | 704 [531-878] | 679 [562-796] | 687 [590-784] | 860 [803-917] | 522 [478-567] | 630 [581-680] |
| **Kolasib** | Cases | 100 | 119 | 219 | 327 | 450 | 777 | 92 | 212 | 304 | 519 | 781 | 1300 |
| Incidence | 288 [231-344] | 161 [132-190] | 202 [175-228] | 941 [839-1043] | 609 [553-666] | 715 [665-766] | 353 [281-425] | 383 [331-434] | 373 [331-415] | 543 [497-589] | 384 [346-423] | 435 [394-476] |
| **Lawngtlai** | Cases | 112 | 113 | 225 | 494 | 645 | 1139 | 266 | 441 | 707 | 872 | 1199 | 2071 |
| Incidence | 237 [193-280] | 112 [92-133] | 152 [132-172] | 1044 [952-1136] | 641 [592-691] | 770 [725-815] | 749 [659-839] | 585 [530-639] | 637 [590-684] | 670 [619-721] | 434 [393-474] | 509 [465-553] |
| **Lunglei** | Cases | 243 | 383 | 626 | 1277 | 1712 | 2989 | 869 | 1408 | 2277 | 2389 | 3503 | 5892 |
| Incidence | 549 [480-618] | 407 [366-448] | 453 [417-488] | 2886 [2727-3044] | 1821 [1734-1907] | 2161 [2084-2239] | 2618 [2444-2792] | 1996 [1892-2101] | 2195 [2105-2286] | 1963 [1876-2050] | 1355 [1282-1427] | 1549 [1472-1626] |
| **Mamit** | Cases | 83 | 190 | 273 | 418 | 706 | 1124 | 185 | 372 | 557 | 686 | 1268 | 1954 |
| Incidence | 265 [208-322] | 285 [245-326] | 279 [246-312] | 1333 [1205-1461] | 1060 [982-1138] | 1147 [1080-1214] | 787 [673-900] | 744 [669-820] | 758 [695-821] | 796 [740-851] | 692 [641-744] | 725 [672-778] |
| **Saiha** | Cases | 45 | 96 | 141 | 284 | 388 | 672 | 160 | 285 | 445 | 489 | 769 | 1258 |
| Incidence | 298 [211-385] | 299 [239-359] | 299 [249-348] | 1881 [1662-2100] | 1209 [1089-1330] | 1424 [1317-1532] | 1413 [1194-1632] | 1184 [1047-1322] | 1257 [1141-1374] | 1178 [1110-1245] | 872 [814-929] | 969 [908-1031] |
| **Saitual** | Cases | 43 | 59 | 102 | 339 | 368 | 707 | 237 | 444 | 681 | 619 | 871 | 1490 |
| Incidence | 235 [165-305] | 152 [113-190] | 178 [144-213] | 1852 [1654-2049] | 946 [849-1042] | 1236 [1145-1327] | 1726 [1506-1946] | 1522 [1380-1663] | 1587 [1468-1706] | 1229 [1161-1298] | 814 [758-870] | 947 [887-1007] |
| **Serchhip** | Cases | 212 | 341 | 553 | 413 | 887 | 1300 | 335 | 982 | 1317 | 960 | 2210 | 3170 |
| Incidence | 1040 [900-1180] | 787 [704-871] | 868 [796-941] | 2026 [1831-2222] | 2048 [1913-2183] | 2041 [1930-2152] | 2192 [1957-2426] | 3023 [2834-3212] | 2757 [2608-2906] | 1713 [1632-1794] | 1856 [1771-1940] | 1810 [1727-1893] |
| **Mizoram** | Cases | 1713 | 2786 | 4499 | 5806 | 9387 | 15193 | 3291 | 7017 | 10308 | 10810 | 19190 | 30000 |
| Incidence | 414 [394-433] | 316 [305-328] | 348 [337-358] | 1402 [1365-1438] | 1066 [1045-1088] | 1174 [1155-1192] | 1059 [1023-1095] | 1063 [1038-1088] | 1062 [1041-1082] | 949 [889-1009] | 793 [738-848] | 843 [786-900] |

Note: The population was taken from Harvard population estimates for 2022 except for Saitual.

The population for Saitual was calculated from the percentage increase of Aizawl and the population of the 2011 census of Saitual.

Incidence was calculated as cases per 100 000 child-years for <15 years age group and cases per 100000 person-years for ≥ 15 years age group.

Cumulative incidence calculates the incidence during the study period (2 years, 9 months)

**Supplementary figure 01:** month-wise distribution of enteric fever among in Mizoram from January 2022- September 2024 (n= 30000)

**
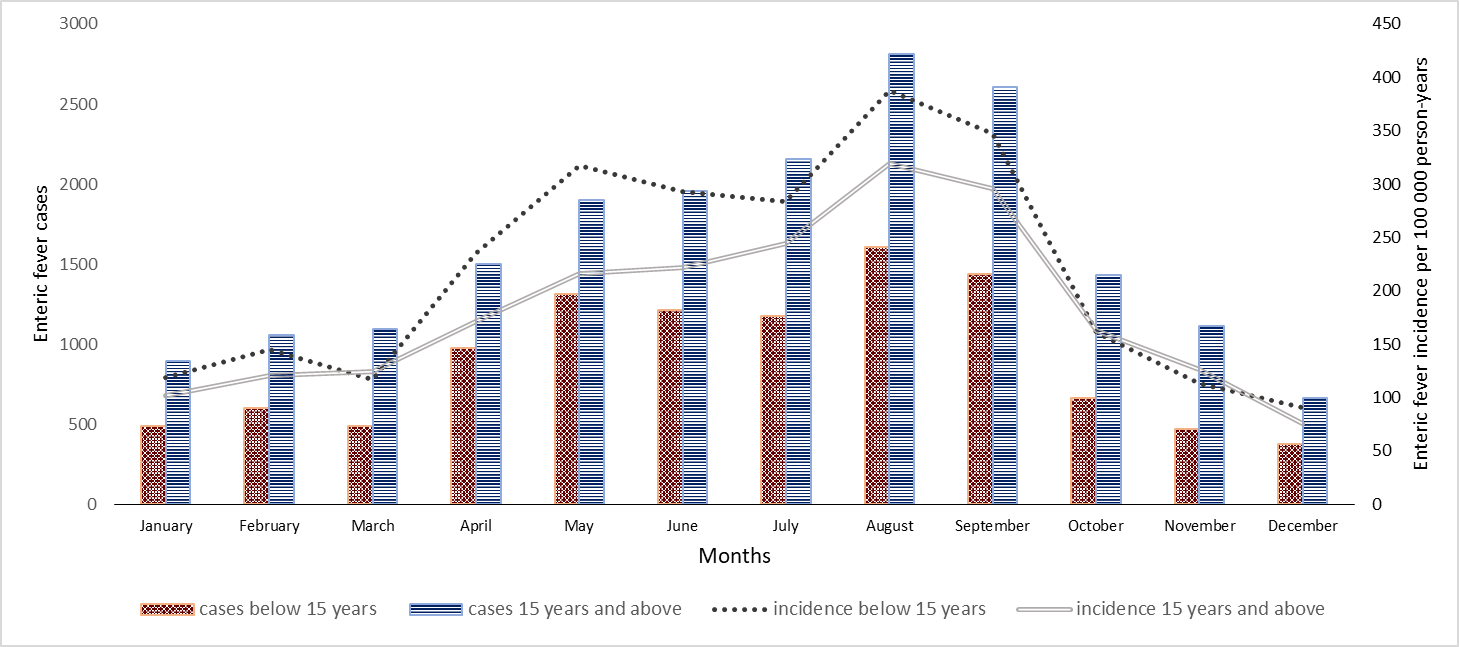
**

The bar graph represents the month-wise enteric fever cases among children below 15 years (red blocks) and age group ≥ 15 years (blue stripes). The incidence of cases among <15 years and ≥ 15 years age groups are represented by a dotted line and a double line, respectively.

**Supplementary figure 02:** Area under the ROC Curve


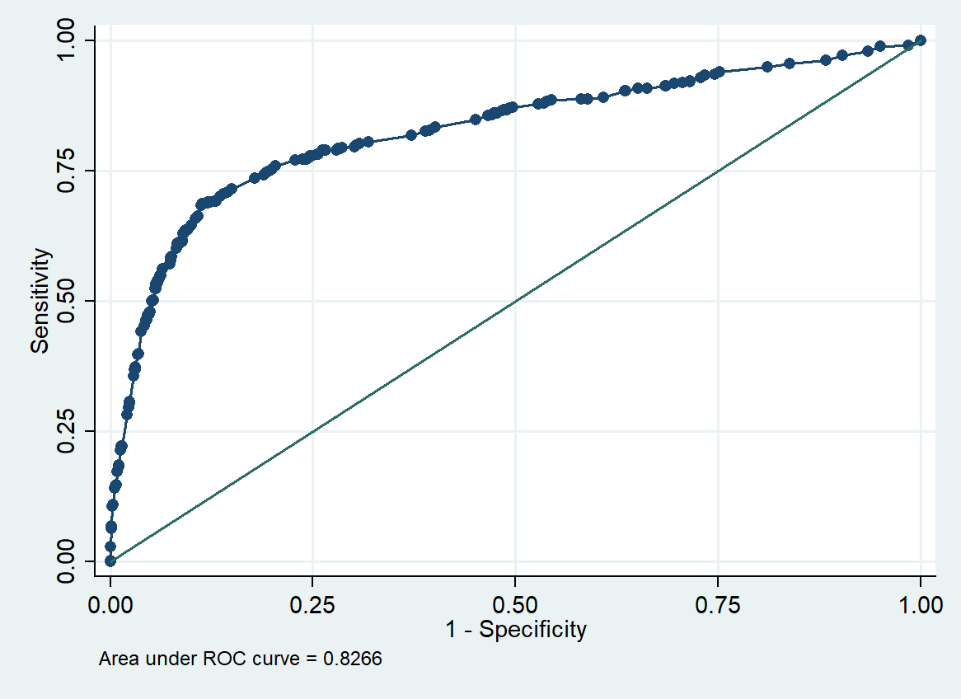


ROC curve representing the performance of the model. The area under the curve (AUC) is 0.8266

**Supplementary figure 03:** Enteric fever cases in Mizoram from 2012-2021 (n= 25,647)


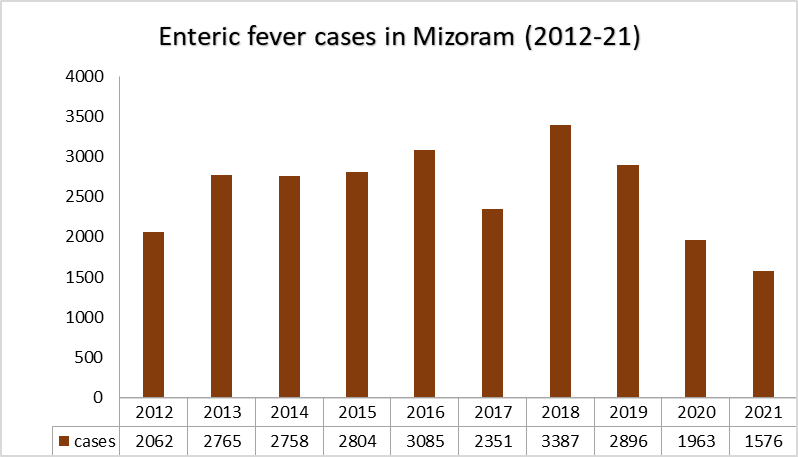


Source: Ministry of Health and Family Welfare, Govt. of India. Data retrieved from the Indiastat (<https://www.indiastat.com>). Note:  Figures are Provisional
